# Supplementary material for: 3D Co-Printing and Substrate Geometry Influence the Differentiation of C2C12 Skeletal Myoblasts
Source: Preprints.org preprint supplement (doi:10.20944/preprints202306.1471.v1), 2023-06-21
Supplement: Supplementary file 1 [file Supplementary_material.docx]

**Supporting information**

**Table 1S.** Summary of primers used for qRT‐PCR.

| Gene | Primer sequences |
| --- | --- |
| PGK (115 bp) | Fw 5’ CAA AAT GTC GTC TTC CAA CAA G 3’  Rw 5’AAC GTT GAA GTC CAC CCT CAT 3’ |
| MyoD (115 bp) | Fw 5’ TGCACTTCCACCAACCCCAACCAGC 3’  Rw 5’ CCTGGACTCGCGCACCGCCTCACT 3’ |
| Myf5 (176 bp) | Fw 5’ GCCCTGAGGAAGAGGAACAC 3’  Rw 5’ CAAGGTCTCGAATGCTTGGT 3’ |
| Cyclin D1 (150 bp) | Fw 5’ TCCTGCTACCGCACAACGC 3’  Rw 5’ CCAGCTTCTTCCTCCACTTCCC 3’ |
| MyoG (152 bp) | Fw 5’ GGGCCCCTGGAAGAAAAG 3’  Rw 5’ AGGAGGCGCTGTGGGAGTT 3’ |
| MCK (103 bp) | Fw 5’ CCTGTTTGATCCCATCATCC 3’  Rw 5’ AGCACATAGTTGGGGTCCAG 3’ |
| Myh1 (113 bp) | Fw 5’ AGTCCCAGGTCAACAAGCTG 3’  Rw 5’ CACATTTTGCTCATCTCTTTG 3’ |
| MCad (...) | Fw5’ CTTGGGTGCCACGGATGA 3’  Rw 5’ATGCAGGCCCTCGGAGAC 3 |
